# Supplementary material
Source: publisher figshare collection journal article supplement (https://tandf.figshare.com/articles/dataset/_/5729217)

**Statistical procedures for primary outcome variable:**

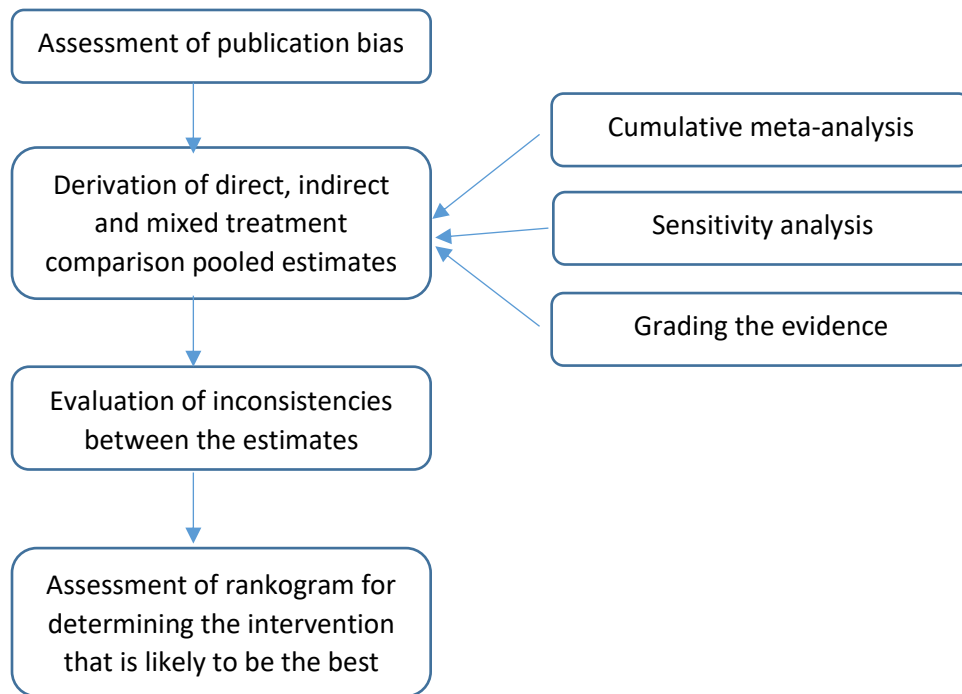

**Statistical procedures for secondary outcome variables:**

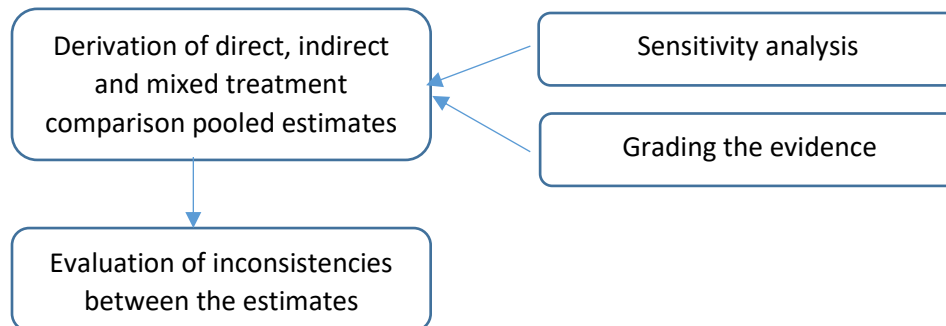

Supplement: Supplementary file 1 [file 1]
