# Supplementary material
Source: publisher figshare collection journal article supplement (https://tandf.figshare.com/articles/dataset/_/5729217)
Supplement: Supplementary file 2 [file 1]

Archive with 9 entries (9 files):
- ESP Figure 1. Network diagram.png
- ESP Figure 2. Risk of bias graph.png
- ESP Figure 3. Inconsistency plot.png
- ESP Figure 4. Rankogram plot.png
- ESP Figure 5a. Forest plot of CMA for PPI Vs H2RA.png
- ESP Figure 5b. Forest plot of CMA of sucralfate with H2RA.png
- Supplementary Digital Content 1.docx
- Supplementary Digital Content 2.pdf
- Supplementary Digital Content Table 1.docx
