# Supplementary material
Source: publisher figshare collection journal article supplement (https://tandf.figshare.com/articles/dataset/_/5729217)
Supplement: Supplementary file 2 [file 1 › Supplementary Digital Content 1.docx]

**Search strategy in Pubmed:**

(((((omeprazole[tiab] AND stress ulcer[tiab]) OR (esomeprazole[tiab] AND stress ulcer[tiab])) OR (lansoprazole[tiab] AND stress ulcer[tiab])) OR (famotidine[tiab] AND stress ulcers[tiab])) OR (ranitidine[tiab] AND stress ulcers[tiab])) OR (((((("Peptic Ulcer Hemorrhage/prevention and control"[MeSH Terms] OR ("anti-ulcer agents"[MeSH Terms] AND critically ill[tiab])) OR (pantoprazole[tiab] AND stress ulcer[tiab])) OR (Sucralfate[tiab] AND stress ulcer[tiab])) OR ("proton pump inhibitors"[MeSH Terms] AND stress ulcer[tiab])) OR ("anti-ulcer agents"[MeSH Terms] AND stress ulcers[tiab])) OR (Stress ulcer[tiab] AND (randomized[tiab] OR randomised[tiab])))
