# Supplementary material
Source: publisher figshare collection journal article supplement (https://tandf.figshare.com/articles/dataset/_/5729217)
Supplement: Supplementary file 2 [file 1 › Supplementary Digital Content Table 1.docx]

**Table 1. Key characteristics of the included studies**

| **Study** | **Population** | **Intervention** | **Comparator** | **Outcomes** |
| --- | --- | --- | --- | --- |
| Kappstein 1991 [18]; Germany | Patients admitted to anesthesiology ICU requiring MV for at least 24 hours and had NG tube | Sucralfate 1 g every 6 hours through NG tube | Cimetidine IV bolus 400 mg TDS | All-cause mortalitya; pneumoniab; gastric colonizationc |
| Tofil 2008 [19]; United Kingdom | Patients admitted in pediatric ICU with NG tube or oro-gastric tubes were included. Those receiving enteral feeding or UGI bleeding at the time of admission were excluded. | Ranitidine 1 mg/kg/dose IV 8 hourly | Pantoprazole or lansoprazole at 1 mg/kg/dose 12-24 hourly intravenously | Overt UGI bleedingd; Pneumoniab; Clinically significant bleedinge |
| Selvanderan 2016 [20]; Australia | Patients admitted to hospital ICU for trauma, neurological injuries or burn injuries were recruited. Those using acid suppressing agents, history of peptic ulcer disease, > 160 mg prednisolone, upper GI surgery, cardiac surgery or pregnant women were excluded. | IV pantoprazole 40 mg once daily | IV normal saline once daily | Overt UGI bleedingd; all-cause mortalityf; pneumoniab; and clinically significant bleedinge |
| Ben-Menachem 1994 [21]; United States of America | Adults admitted to medical ICU were recruited. Those with stay of < 24 hours, evidence of GI bleeding at the time of admission, receiving antacids, sucralfate, omeprazole in the past 24 hours or use of anti-coagulants, NSAIDs, thrombolytics in the past 7 days, head injury or grade 4 encephalopathy were excluded. | One group received sucralfate 1 g orally every 6 hours. Another group received IV cimetidine 300 mg loading dose followed by continuous infusion. | No agents for SUP administered. | Overt UGI bleedingd; all-cause mortalitya; pneumoniab; length of stay |
| Apte 1992 [22]; India | Patients with tetanus and been tracheotomized were recruited. | IV ranitidine 50 mg 6 hourly | No agents for SUP administered. | Overt UGI bleedingd; Occult UGI bleedingg; all-cause mortalitya; pneumoniab; gastric colonizationc |
| Brophy 2010 [23]; United States of America | Patients admitted in neurosurgery ICU and received SUP with gastric pH < 4.0 prior to the first dose of lansoprazole or famotidine with MV were recruited. Those with gastro-intestinal hemorrhage, history of duodenal or gastric ulcer, allergy to the administered SUP agents, pregnancy or renal decompensation were excluded. | 30 mg lansoprazole suspension in 10 ml of 8.4% sodium bicarbonate solution. | 20 mg Famotidine IV twice a day | Clinically significant bleeding;e Occult UGI bleedingg |
| Cannon 1987 [24]; United States of America | Critically ill patients with acute respiratory failure were recruited. Those with known allergy to cimetidine, antacids or sucralfate, known UGI bleeding, pregnancy, lactating mother, ventilator dependence were excluded. | Cimetidine 300 mg IV 6th hourly. | 30 ml antacid orally and dose repeated after checking the gastric pH. | Overt UGI bleedingd; occult UGI bleedingg; all-cause mortalitya |
| Ryan 1993 [25]; United States of America | Patients above 16 years of age with NG tube and MV were recruited in the study. Those with UGI bleeding or pneumonia, previous gastric surgery or any SUP agents in the past 24 hours were excluded. | Sucralfate 1 g 6th hourly through NG tube | Cimetidine 300 mg Iv bolus followed by 37.5 mg/h continuous infusion | Overt UGI bleedingd; all-cause mortalitya; pneumoniab |
| Cioffi 1994 [26]; United States of America | Adult burn patients within 48 hours of injury with more than 20% total body surface area. Those with the past history of PVD, H2RA or pneumonia were excluded. | IV cimetidine 300 mg 6th hourly with 30 ml antacid bolus every 2 hours administered. | Sucralfate 1 g every 6 hours. | Overt UGI bleedingd; all-cause mortalitya; pneumoniab; gastric colonizationc |
| Cook 1998 [27]; United States of America | Adults admitted in ICU requiring MV for at least 48 hours were recruited. Those with UGI bleeding, pneumonia, gastrectomy, with poor prognosis were excluded. | 1 g sucralfate 76th hourly through NG tube with IV placebo administered 8th hourly. | 50 mg IV ranitidine 8 hourly with oral placebo through NG tube. | All-cause mortalitya; pneumoniab; length of stay; clinically significant bleedinge |
| Halloran 1980 [28]; United States of America | Patients of head injury managed in ICU were recruited. | IV cimetidine 300 mg bolus every 4th hourly | Placebo IV every 4th hourly. | Overt UGI bleedingd; Clinically significant bleedinge |
| Noseworthy 1987 [29]; Canada | Patients admitted to the adult ICU without UGI bleeding, active duodenal or gastric ulcer were recruited. | Antacids through NG tube | Ranitidine IV 50 mg 6th hourly | Overt UGI bleedingd; all-cause mortalitya |
| Mustafa 1994 [30]; Turkey | Critically ill patients admitted in ICU were recruited. | 2 g sucralfate 6th hourly through NG tube | IV ranitidine 100 mg 8th hourly | Overt UGI bleedingd; pneumoniah; gastric colonizationh |
| Pro’dham 1994 [31]; Switzerland | Patients admitted to medical or surgical ICU receiving MV and NG tube in place were recruited. Those with active UGI bleeding, receiving antacids, H2RA, sucralfate, esogastric surgery, cardiac surgery or organ transplantations were excluded. | 20 ml aluminium hydroxide and magnesium hydroxide every 2nd hourly. | Ranitidine 150 mg IV continuous infusion | Overt UGI bleedingd; all-cause mortalitya; pneumoniab; gastric colonizationc; clinically significant bleedinge |
| Yildizdas 2002 [32]; Turkey |  | 60 mg/kg/d sucralfate in 4 doses through NG tube to one group. Another group received omeprazole IV at 1 mg/kg/day. IV ranitidine 2 mg/kg/d in 4 doses to the third interventional group. | No active medication. | Overt UGI bleedingd; all-cause mortalitya; pneumoniab |
| Pickworth 1993 [33]; United States of America | Patients with multiple injuries, between 15 and 42 years of age admitted to surgical ICU and endotracheally intubated within 24 hours and with NG tube were recruited. Those transferred from another hospital, active UGI bleeding, history of SUP agents, pregnancy, chest x-ray infiltration, spinal cord injury were excluded. | Sucralfate 1 g through NG tube 6th hourly | Ranitidine IV 50 mg every 6 hours | All-cause mortalitya; pneumoniab |
| Ruiz-Santana 1991 [34]; Spain | Patients admitted to ICU with illness of sufficient severity requiring MV with metabolic stress, receiving total parenteral nutrition, normal hepatic and renal function and hemodynamically stable were included. Those with spinal cord injury, history of peptic ulcer disease, previous surgery, hepatic or renal failure were excluded. | Sucralfate 1 g every 4 hours through NG tube. | IV ranitidine 50 mg every 6th hourly | Overt UGI bleedingd; All-cause mortalitya |
| Thomason 1996 [35]; United States of America | Adults admitted to ICU having MV and NG tube were recruited. Those with pregnancy or receiving any SUP agent were excluded. | Sucralfate 1 g every 6 hours to one group and ranitidine 6.25 mg/h continuous infusion for another group. | 1350 mg aluminium hydroxide and 1200 mg magnesium hydroxide every 4 hours. | Overt UGI bleedingd; all-cause mortalitya; pneumoniab |
| Metz 1993 [36]; United States of America | Patients with severe head injury with NG tube in place and staying in ICU for at least 12 hours were included. | Ranitidine 6.25 mg/hr continuous infusion for 5 days | Normal saline infusion administered for 5 days | Overt UGI bleedingd; occult UGI bleedingg; pneumoniab |
| Prakash 2008 [37]; India | Patients admitted in adult ICU receiving MV for at least 24 hours with NG tube and expected ICU stay of at least 3 days were included. Those requiring MV for < 24 hours, receiving any SUP agent at the baseline or evidence of infiltrates in the chest X-ray, pregnant women were excluded. | Sucralfate 1 g 6th hourly through NG tube | Ranitidine IV 50 mg 6th hourly. | Overt UGI bleedingd; all-cause mortalitya; pneumoniab; gastric colonizationc |
| Levy 1997 [38]; United States of America | Patients admitted in ICU with atleast one risk factor such as burns, coagulopathy, acute hepatic failure, major neurological insult, acute renal failure, respiratory failure, sepsis, shock, trauma were included. Pregnant women, patients with UGI hemorrhage were excluded. | IV ranitidine 50 mg every 8 hours | Oral omeprazole 40 mg/day | All-cause mortalitya; pneumoniah; length of stay; clinically significant bleedinge |
| Misra 2005 [39]; India | Patients with intracranial hemorrhage and within 7 days of seizures were included. Those with arterio-venous malformations, aneurysmal bleeding or coagulation disorders, hepatic or renal failure were excluded. | IV ranitidine 50 mg 8th hourly | Sucralfate 1 g through NG tube 6th hourly | Overt UGI bleedingd; all-cause mortalityi; pneumoniah |
| Ortiz 1998 [40]; United States of America | Critically ill patients with respiratory failure on MV were recruited. Those without NG tube, with prior gastric ablation, pneumonia at the time of admission were excluded. | Sucralfate 1 g orally 6th hourly to one group. IV cimetidine 300 mg every 8 hours to another group. | No active agents for SUP. | All-cause mortalitya, j; length of stay; clinically significant bleedinge |
| Mulla 2001 [41]; United Kingdom | Post cardiac surgery patients requiring continuous veno-venous hemofiltration without active UGI bleeding, peptic ulcer disease or chronic renal failure were included. | Sucralfate 1 g through NG tube 4 times a day. | IV ranitidine 50 mg twice a day. | All-cause mortalitya |
| Liu 2013 [42]; China | Patients with intracranial hemorrhage with NG tube were included. Those with arterio-venous malformation, peptic ulcer disease, renal insufficiency were excluded. | Omeprazole 40 mg 12th hourly intravenously | IV cimetidine 300 mg 6th hourly | Overt UGI bleedingd; all-cause mortalitya; pneumoniah |
| Laggner 1989 [43]; Austria | Patients with acute respiratory failure and were MV without bleeding from UGI, nasopharynx or allergy to sucralfate or ranitidine were included. | Sucralfate 1 g 6 times a day via NG tube. | IV ranitidine 50-100 mg 6 times a day. | Overt UGI bleedingd; all-cause mortalitya; pneumoniab; clinically significant bleedinge |
| Khorvash 2014 [44]; Iran | Patients admitted in ICU were included. Those were discharged early or died before 10 days, antibiotic initiation before pneumonia were excluded. | Sucralfate 1 g through NG tube every 6 hours. | Pantoprazole 40 mg twice a day. | All-cause mortalitya; pneumoniab; length of stay |
| Hanisch 1998 [45]; Germany | Patients referred to surgical ICU without peptic ulcer disease, ulcer medication, UGI bleeding or organ transplantation were recruited. | 10 mg IV pirenzepine administered 12 hourly to one group. Another group received 50 mg IV ranitidine thrice a day. | Placebo was administered. | All-cause mortalitya; pneumoniab; clinically significant bleedinge |
| Fabian 1993 [46]; United States of America | Patients admitted to trauma ICU with endotracheal intubation and NG tube. | Sucralfate 1 g every 6 hours through NG tube to one group. Another group received cimetidine at the dose of 300 mg loading dose followed by 40 mg/h continuous intravenous infusion. | IV cimetidine 300 mg every 8 hours as bolus doses | Overt UGI bleedingd; all-cause mortalitya; pneumoniab; length of stay; clinically significant bleedinge |
| Ephgrave 1998 [47]; United States of America | Patients scheduled for major elective surgery requiring NG intubation. | Sucralfate 1 g through NG tube every 6 hours | Antacids 15 ml every 2 hours. | Overt UGI bleedingd; all-cause mortalitya; pneumoniab; gastric colonizationh |
| Eddleston 1991 [48]; United Kingdom | Patients requiring MV support for at least 4 days with one of the following risk factors: hypotension; sepsis; renal dysfunction; hepatic dysfunction; CNS injury or coma | Sucralfate 1 g through NG tube 6th hourly | IV ranitidine 50 mg 6th hourly | All-cause mortalitya; pneumoniab; overt UGI bleedingd |
| Driks 1987 [49]; United States of America | Patients admitted in ICU with intubation within 24 hours receiving MV and with NG tube were included. Those with UGI hemorrhage or receiving any SUP agent were excluded. | Sucralfate 1 g through NG tube 6th hourly to one group and IV ranitidine or cimetidine to another group. | Antacids (details of dose, frequency were not mentioned) | Overt UGI bleedingd; occult UGI bleedingg; pneumoniab |
| Conrad 2005 [50]; United States of America | Adults with ICU stay more than 72 hours; requiring MV and APACHE II score above 11 with NG tube were included. | 40 mg omeprazole with 20 meq sodium bicarbonate initially 6-8 hour frequency with IV placebo were administered. | IV cimetidine 300 mg bolus followed by continuous infusion at 50 mg/hour and oral placebo. | Overt UGI bleedingd; all-cause mortalitya; pneumoniab; clinically significant bleedinge |
| Chan 1995 [51]; Hong Kong | Non-traumatic neurosurgical patients with > 2 risk factors who underwent surgery. | IV ranitidine 50 mg 6th hourly | Normal saline IV 6th hourly | Overt UGI bleedingd; all-cause mortalitya; pneumoniab |
| Burgess 1995 [52]; United States of America | Adults with head injury with GCS < 10 admitted in surgical ICU. | Ranitidine 6.25 mg/hour continuous infusion for 72 hours. | Normal saline continuous infusion for 72 hours. | Clinically significant bleedinge; all-cause mortalitya |
| Borrero 1985 [53]; United States of America | Patients admitted to medical or surgical ICU for one or more of the following: hypotension; major surgical procedure; multiple trauma; renal failure; jaundice were included. | Sucralfate 1 g every 6 hours | 30 ml antacid every 6 hours | Occult UGI bleeding; all-cause mortality |
| Darlong 2003 [54]; India | Patients admitted in ICU with intubation and likely to stay in ICU for > 24 hours. Those with UGI hemorrhage or received antacids, H2RA or sucralfate were excluded. | Ranitidine IV 50 mg every 8 hours | Sucralfate 1 g every 8 hours through Ryle’s tube | Overt UGI bleedingd; gastric colonizationh |
| Kantorova 2004 [55]; Czech republic | Patients with trauma or major surgery admitted in ICU with MV for > 48 hours and coagulopathy were included. | Omeprazole 40 mg IV once a day to one group. Famotidine 40 mg IV twice a day to another group and sucralfate 1 g through NG tube 6th hourly to third group. | Placebo | All-cause mortalitya; pneumoniab; length of stay; gastric colonizationc; clinically significant bleedinge |
| van den Berg 1985 [56]; Netherlands | Critically ill patients on assisted ventilation without UGI bleeding on admission or previous esophageal or gastric surgeries were included. | IV cimetidine 20 mg/kg/day continuous infusion | Placebo | Overt UGI bleedingk |
| Somberg 2008 [57]; United States of America | Adult men or women with either a major surgery or trauma, hypovolemic shock, sepsis were included. | Pantoprazole 40 mg IV daily, 40 mg twice daily, 80 mg IV daily or 80 mg IV twice daily | Cimetidine IV 300 mg bolus then 50 mg/hour infusion. | Clinically significant bleedinge; all-cause mortalitya; pneumoniab |
| Pan 2004 [58]; China | Patients with severe pancreatitis | Rabeprazole 20 mg orally daily to one group. | Famotidine 40 mg IV twice daily. | Overt UGI bleedingd |
| Phillips abstract [59]; United States of America | Patients with MV and other risk factors. | Omeprazole 40 mg once daily orally and then 20 mg daily. | IV ranitidine 50 mg loading dose followed by 150-200 mg/day infusion | Overt UGI bleedingh |
| Powell 1993 [60]; United Kingdom | Patients undergoing cardiac surgery | Omeprzole 80 mg IV bolus then 40 mg IV bolus three time a day to one group, omeprazole 80 mg IV bolus and then 40 mg IV infusion three times daily to another group. Ranitidine 50 mg IV three times a day to another group. | Placebo | Overt UGI bleedingd |
| Solouki 2009 [61]; Iran | Patients requiring MV with other risk factors | Omeprazole 20 mg twice daily | IV ranitidine 50 mg twice daily | Overt UGI bleedingh; pneumoniab |
| Fink abstract [62]; United States of America | Adult critically ill patients | Pantoprazole 40 mg IV daily, 40 mg twice daily, 80 mg IV daily or 80 mg IV twice daily. | Cimetidine IV 300 mg bolus then 50 mg/hour infusion. | Overt UGI bleedingh |
| Bashar 2013 [63]; Iran | Trauma patients admitted in ICU receiving MV | Pantoprazole 40 mg IV daily then 40 mg PO daily. | Rantidine IV 50 mg three times a day | Pneumoniab |
| Lee 2014 [64]; Taiwan | Patients admitted in neurosurgical ICU | Esomeprazole 40 mg PO daily. | Famotidine 20 mg IV twice daily | Overt UGI bleedingd; pneumoniab |
| Wee abstract [65]; United States of America | Critically ill patients with risk factors. | Pantoprazole 40 mg IV daily | Famotidine 20 mg IV twice daily | Overt UGI bleedingh |
| Bhanot abstract [66]; India | Critically ill patients with MV. | Omeprazole 40 mg PO daily to one group. Ranitidine 50 mg IV four times daily. | Sucralfate 1 g four times daily PO | Pneumoniah |
| Tryba 1985 [67]; Germany | Patients admitted in neurosurgical ICU | Sucralfate 1 g every 6 hours | IV cimetidine 2 g over 24 hours continuous infusion | Overt UGI bleedingd |
| Laggner 1988 [68]; Austria | Patients admitted to medical ICU | Sucralfate 1 g every 4 hours | Ranitidine 50-100 mg IV every 4 hours | Overt UGI bleedingd |
| Harlaftis 1997 [69]; Greece | Patients admitted in ICU with MV | Sucralfate 1 g every 4 hours | Ranitidine IV 50 mg every 8 hours | Pneumoniah |
| De Azevedo 2000 [70]; Brazil | Critically ill patients with risk factors such as MV and coagulopathy | IV omeprazole 40 mg twice daily to one group. Ranitidine 50 mg thrice a day to another group. | Sucralfate 1 g every 6 hours | Clinically significant bleedinge; pneumoniab |

ICU – intensive care unit; MV – mechanical ventilation; IV- intravenous; TDS – three times a day; GI – Gastro-intestinal; SUP – Stress ulcer prophylaxis; CNS – central nervous system; GCS – Glasgow coma scale.

a – During admission in intensive care unit; b – Clinical signs with chest X-ray evidence of new infiltrates; c – from gastric fluid aspirate; d – defined as bloody gastric aspirate or hematemesis; e – bleeding with hemodynamic changes (tachycardia or hypotension) or hemoglobin drop more than 2 g/dl within 24 hours or needing blood transfusion; f – 90 day mortality; g – using benzidine test; h – not defined; i – 30 day mortality; j – hospital mortality; k – assessed by labeling erythrocytes using 51chromium chloride
