# Supplementary material
Source: publisher figshare collection journal article supplement (https://tandf.figshare.com/articles/dataset/_/5729217)

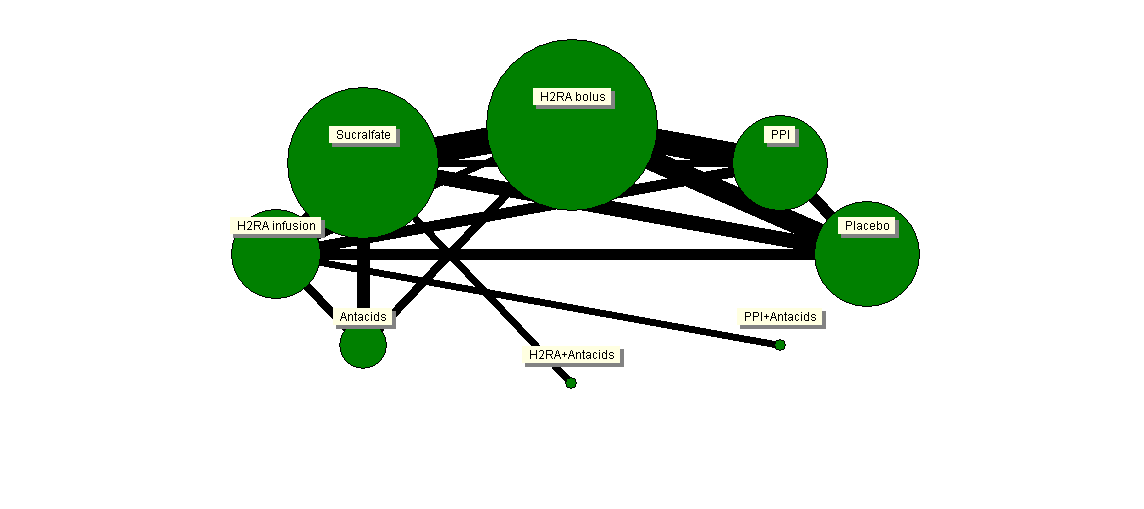

Supplement: Supplementary file 2 [file 1 › ESP Figure 1. Network diagram.png]

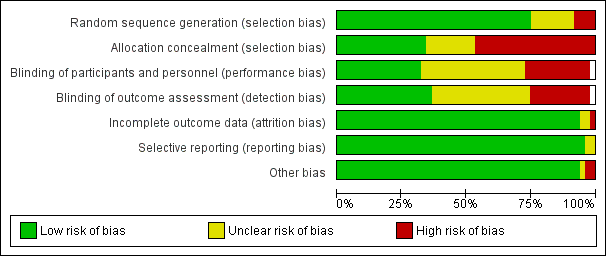

Supplement: Supplementary file 2 [file 1 › ESP Figure 2. Risk of bias graph.png]

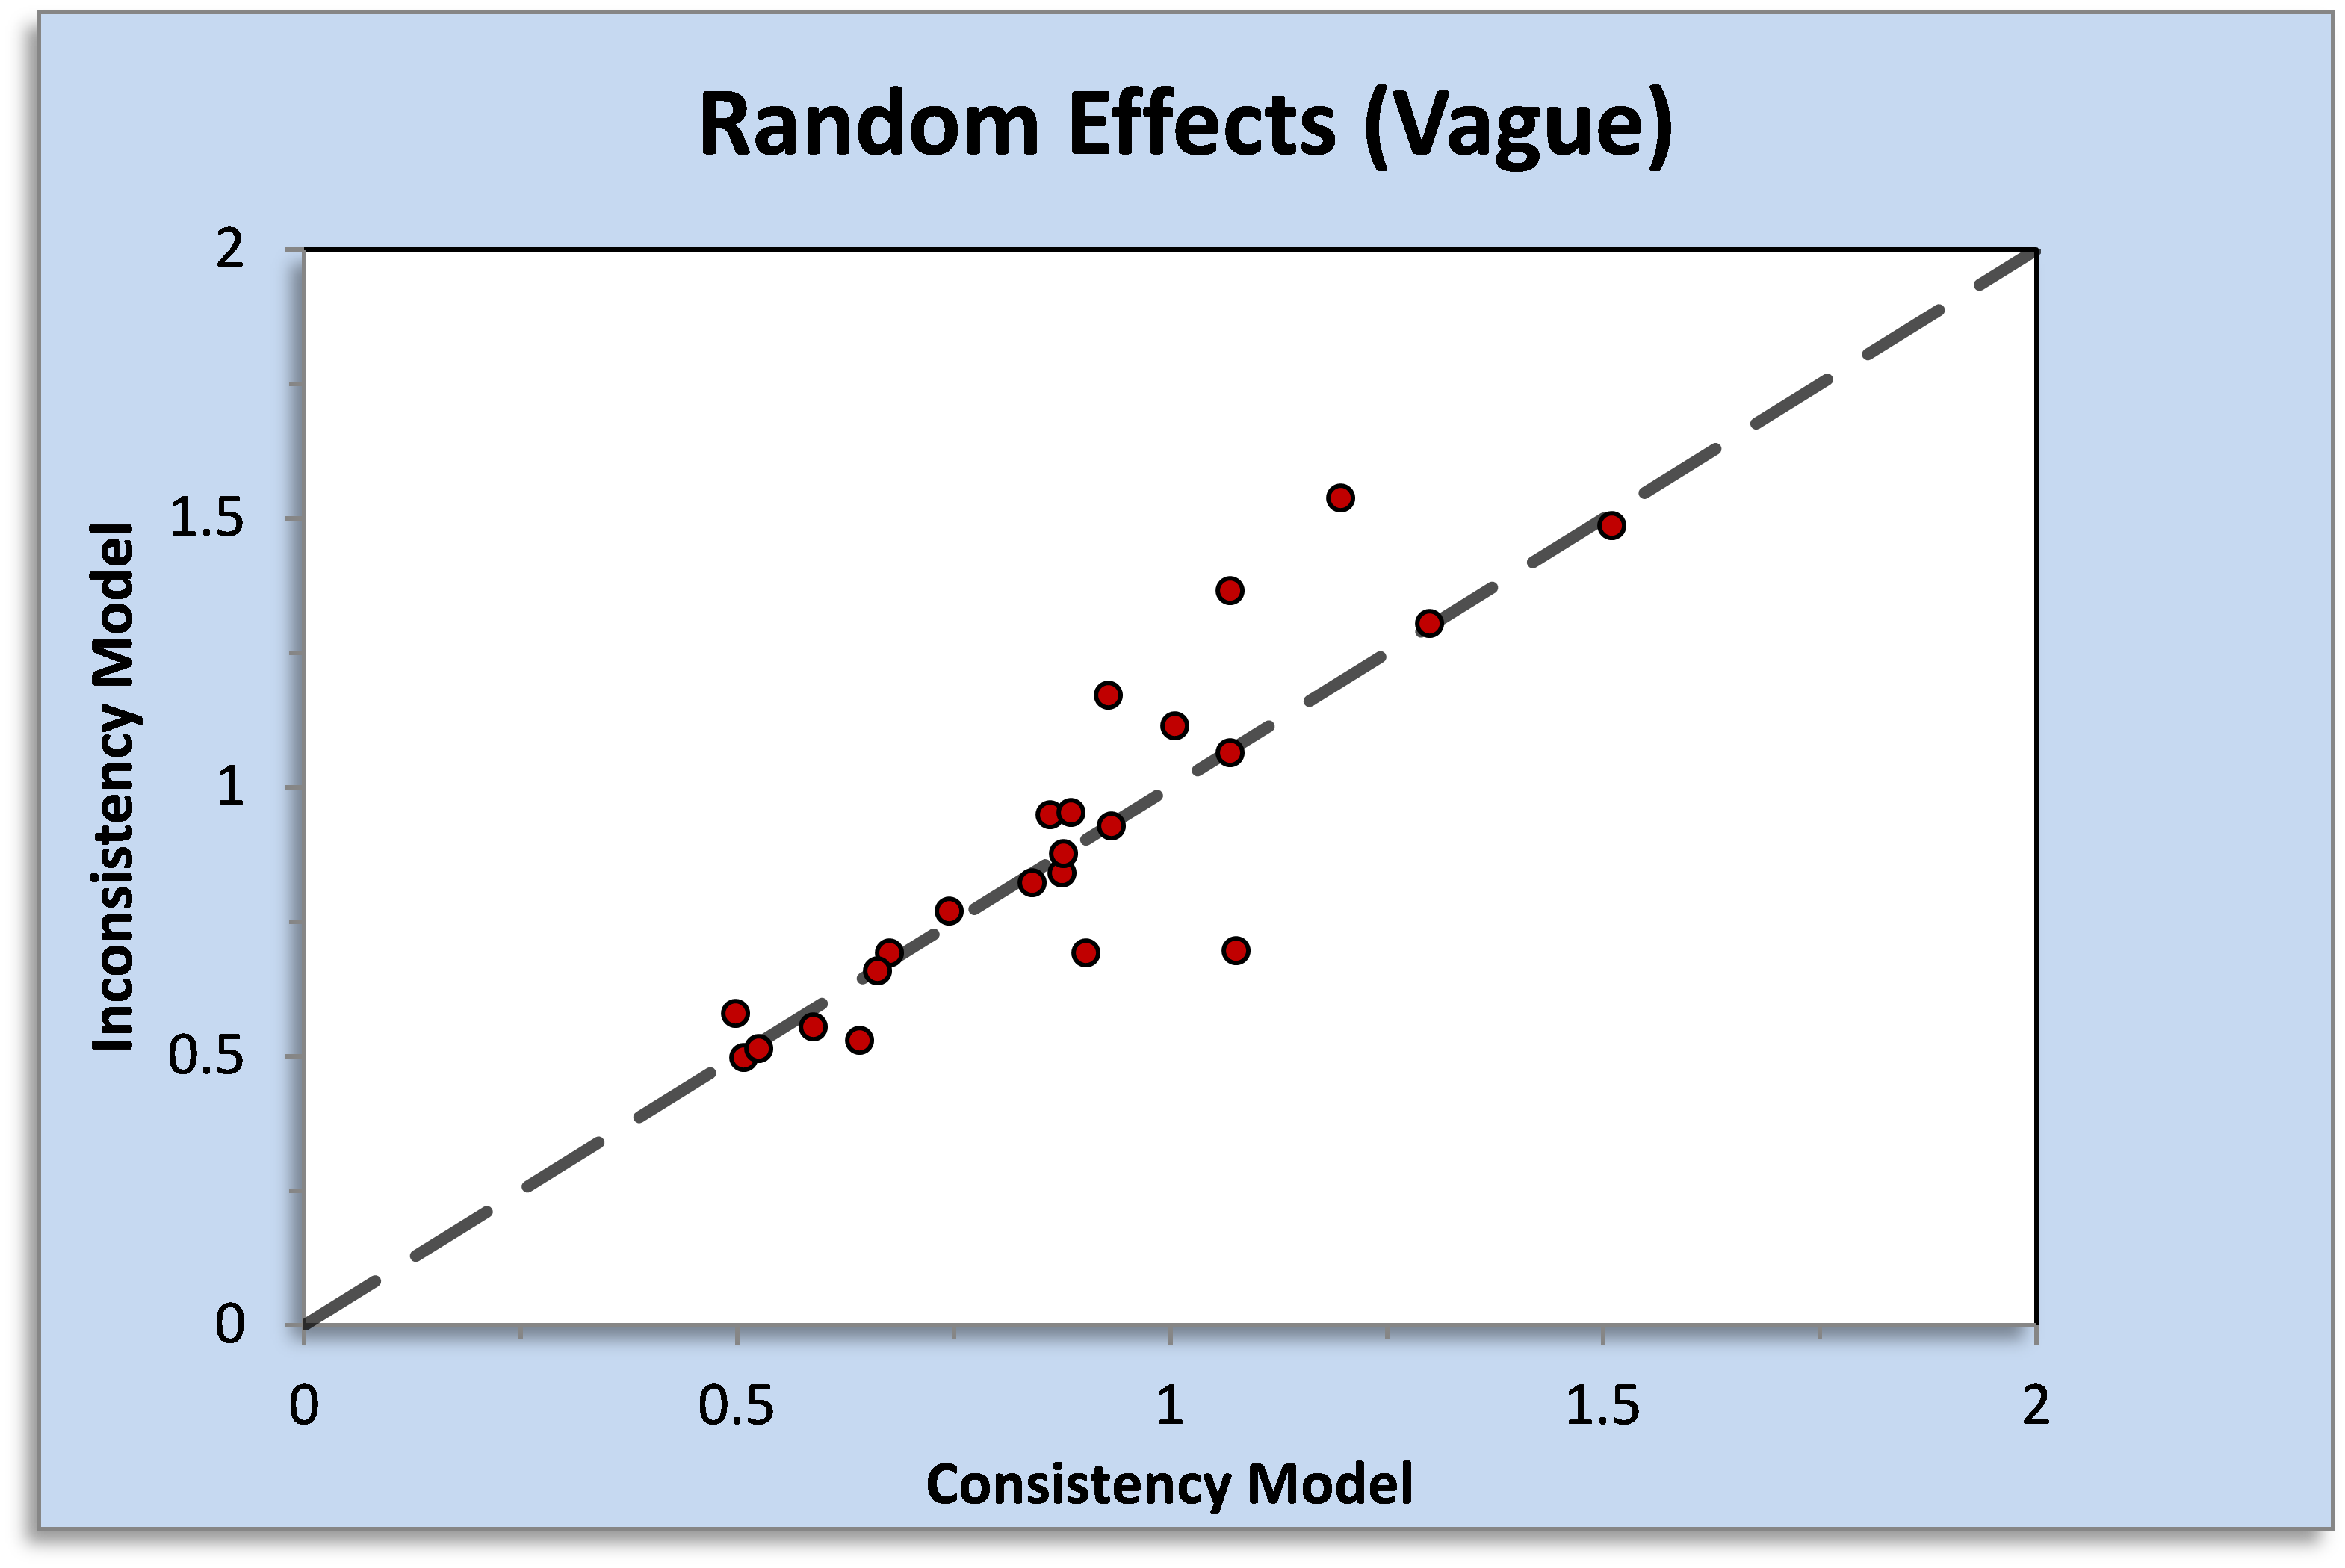

Supplement: Supplementary file 2 [file 1 › ESP Figure 3. Inconsistency plot.png]

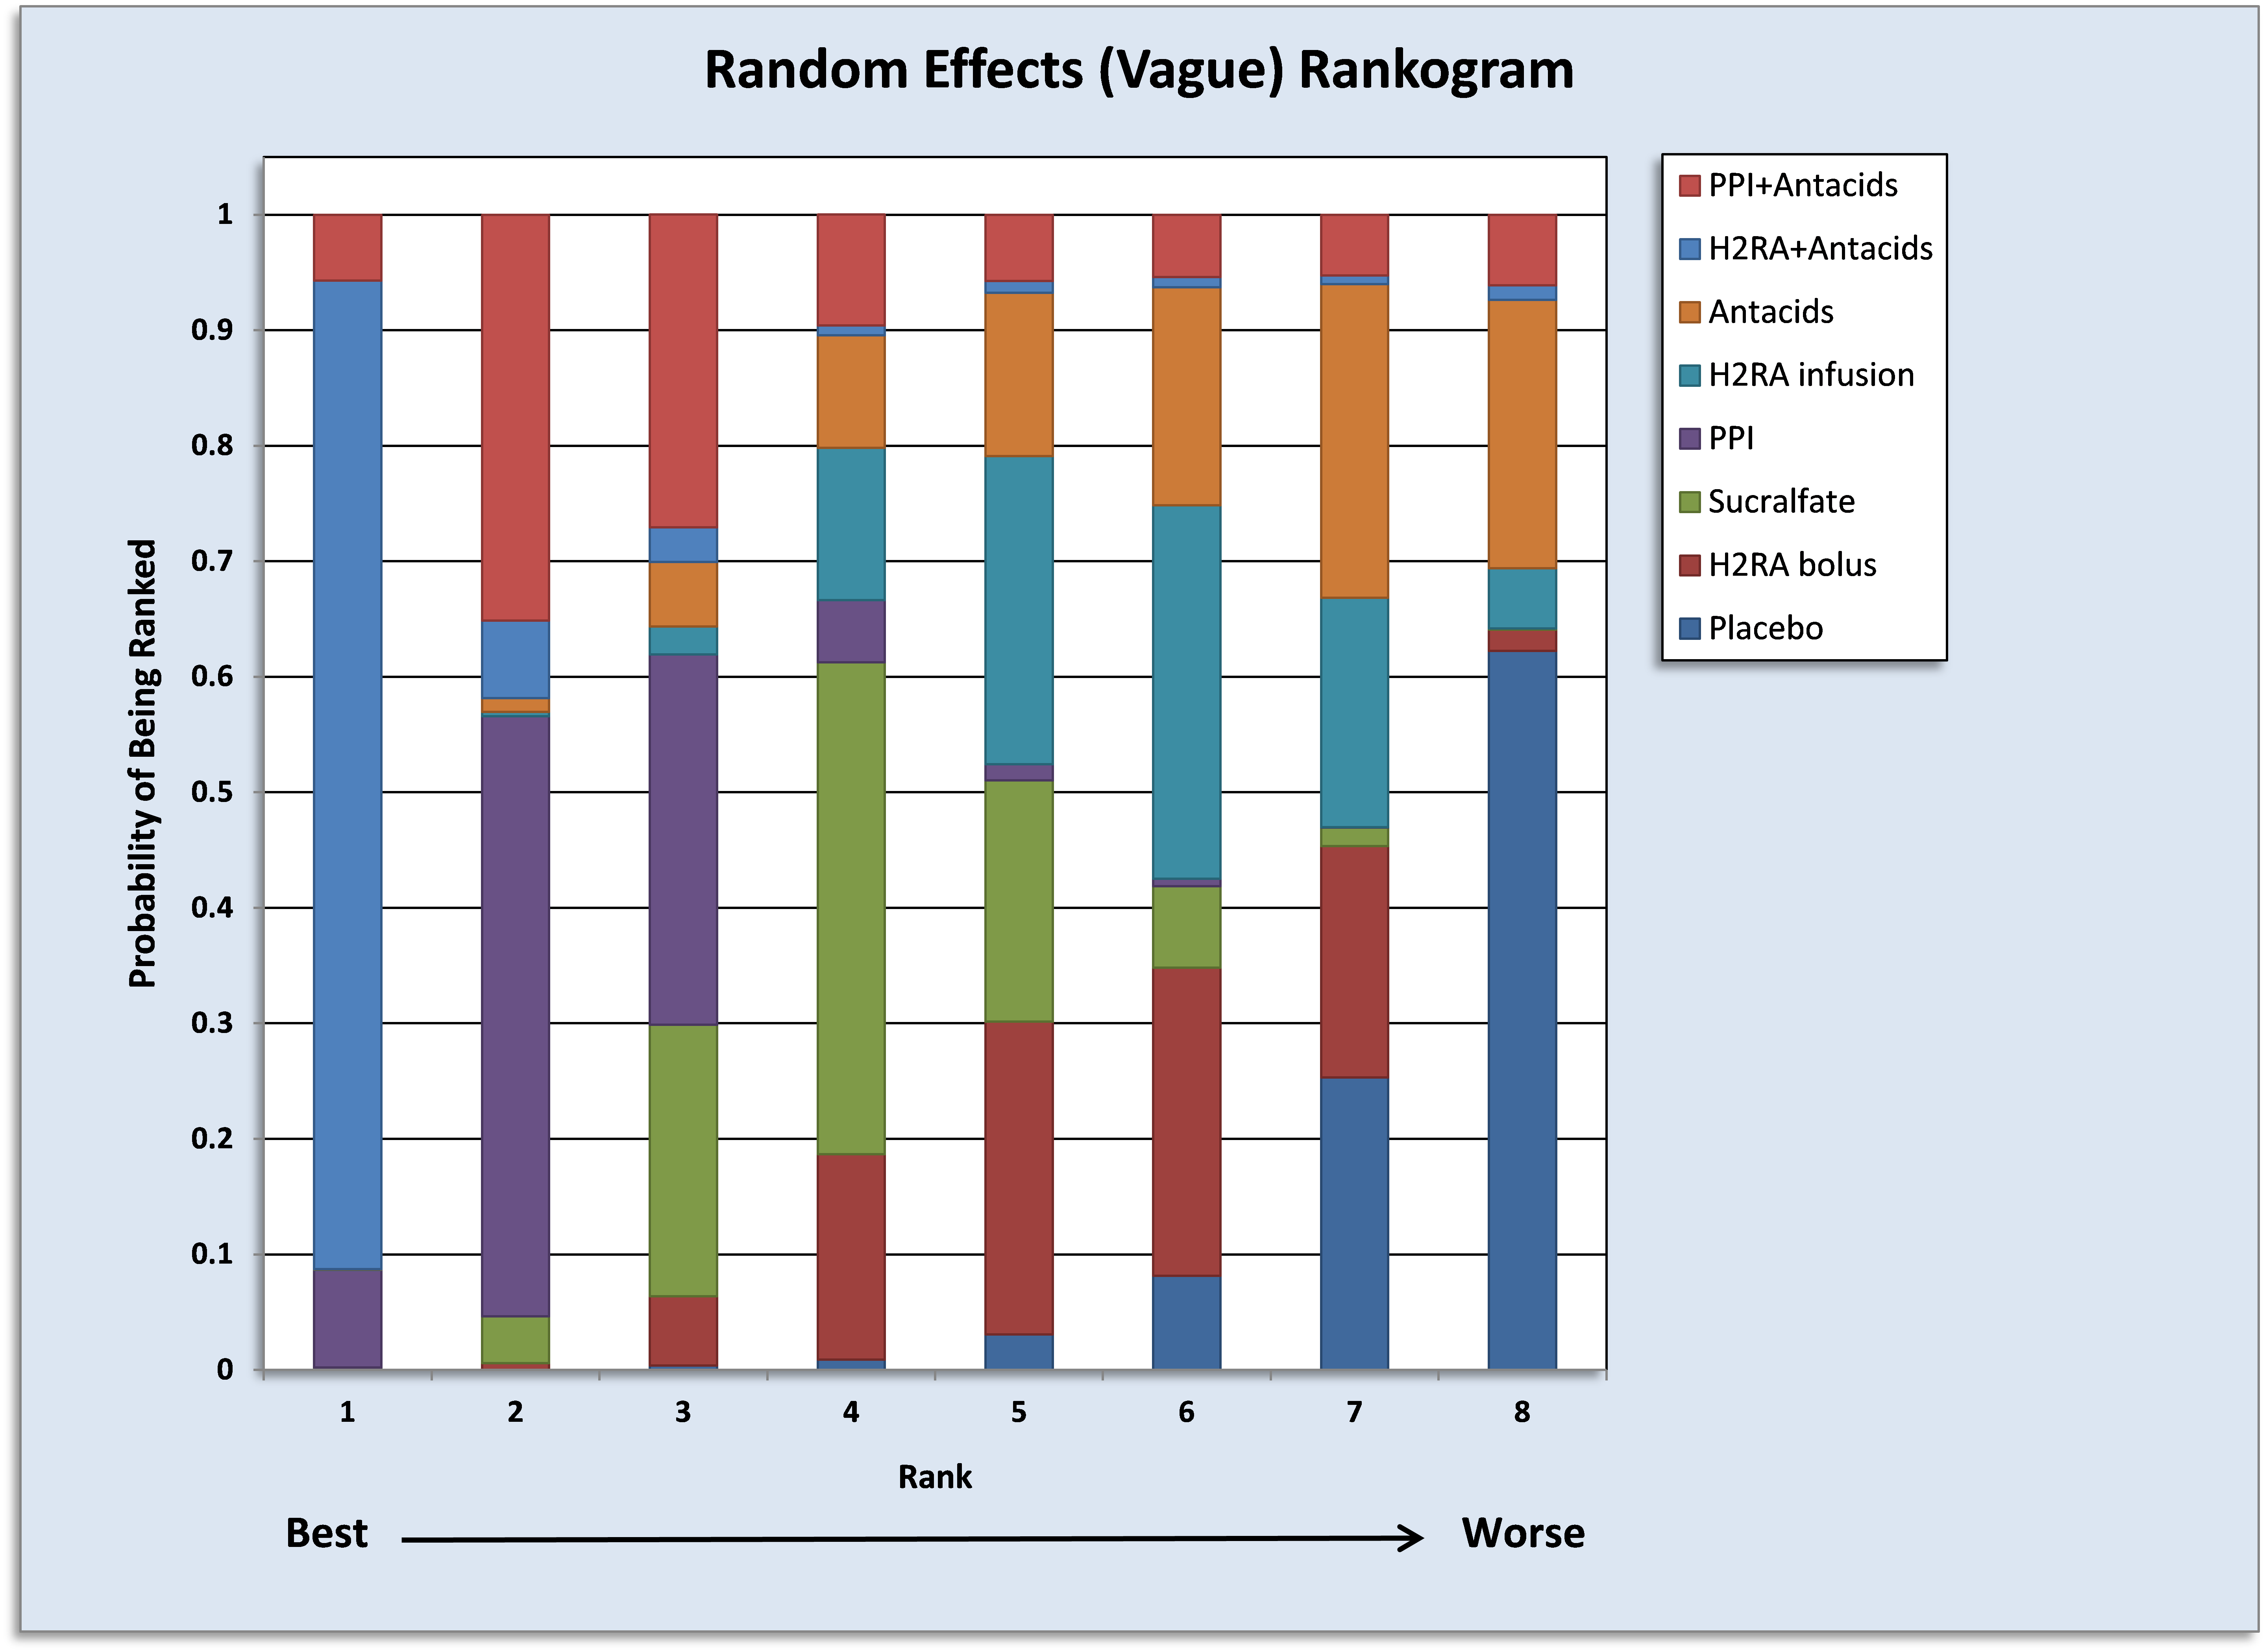

Supplement: Supplementary file 2 [file 1 › ESP Figure 4. Rankogram plot.png]

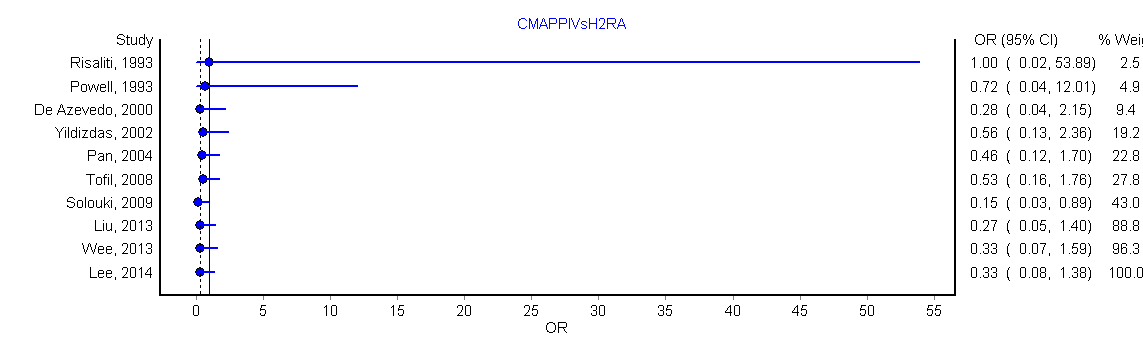

Supplement: Supplementary file 2 [file 1 › ESP Figure 5a. Forest plot of CMA for PPI Vs H2RA.png]

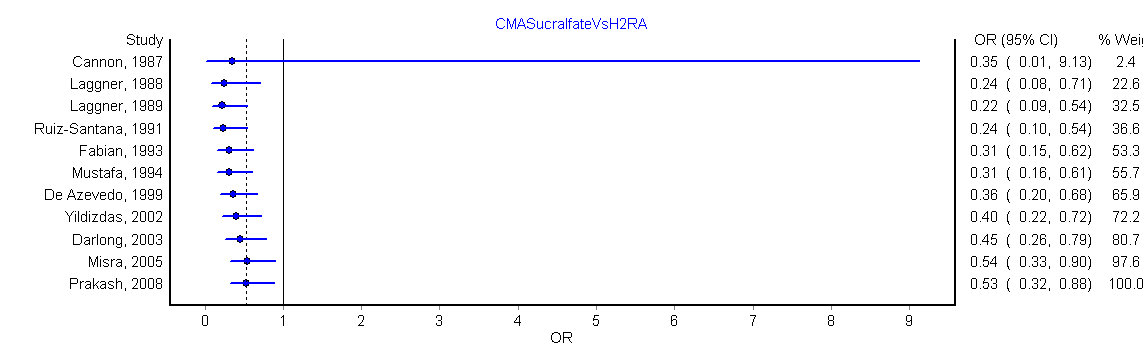

Supplement: Supplementary file 2 [file 1 › ESP Figure 5b. Forest plot of CMA of sucralfate with H2RA.png]
